# Supplementary material for: An in vitro tumorigenesis model based on live-cell-generated oxygen and nutrient gradients
Source: PubMed Central journal article supplement (PMC8050328; doi:10.1038/s42003-021-01954-0), 2021-04-15
Supplement: 42003_2021_1954_MOESM2_ESM.pdf [file 42003_2021_1954_MOESM2_ESM.pdf]

An *in vitro* tumorigenesis model based on live-cell-generated oxygen and nutrient gradients. Gilmore, et al.

## Supplementary information

### **An *in vitro* tumorigenesis model based on live-cell-generated oxygen and nutrient gradients**

Anne C. Gilmore<sup>1§</sup>, Sarah J. Flaherty<sup>1</sup>, Veena Somasundaram<sup>2</sup>, David A. Scheiblin<sup>3</sup>, Stephen J. Lockett<sup>3</sup>, David A. Wink<sup>2</sup>, William F. Heinz<sup>3\*</sup>

<sup>1</sup>Optical Microscopy and Analysis Laboratory, Office of Science and Technology Resources, Center for Cancer Research, National Cancer Institute, National Institutes of Health

<sup>2</sup>Laboratory of Cancer Immunometabolism, Center for Cancer Research, National Cancer Institute, National Institutes of Health

<sup>3</sup>Optical Microscopy and Analysis Laboratory, Cancer Research Technology Program, Frederick National Laboratory for Cancer Research, Frederick, MD

<sup>§</sup>Current address: Graduate School of Biomedical Sciences, St. Jude Children's Research Hospital, Memphis, TN.

*Running title:* Oxygen and nutrient gradient tumorigenesis model

*Keywords:* hypoxia, tumor microenvironment, live cell model

*\*Correspondence should be addressed to:*

William F. Heinz  
Optical Microscopy and Analysis Laboratory  
Frederick National Lab For Cancer Research  
Leidos Biomedical Research, Inc.  
P.O. Box B  
Frederick, MD 21702  
301-846-1239  
will.heinz@nih.gov

## Contents

|                         | Page |
|-------------------------|------|
| Supplementary Figure 1  | 3    |
| Supplementary Figure 2  | 4    |
| Supplementary Figure 3  | 5    |
| Supplementary Figure 4  | 7    |
| Supplementary Figure 5  | 8    |
| Supplementary Figure 6  | 9    |
| Supplementary Figure 7  | 9    |
| Supplementary Figure 8  | 10   |
| Supplementary Figure 9  | 12   |
| Supplementary Figure 10 | 13   |
| Supplementary Figure 11 | 15   |
| Supplementary Figure 12 | 17   |
| Supplementary Figure 13 | 18   |
| Supplementary Figure 14 | 19   |
| Supplementary Method    | 21   |

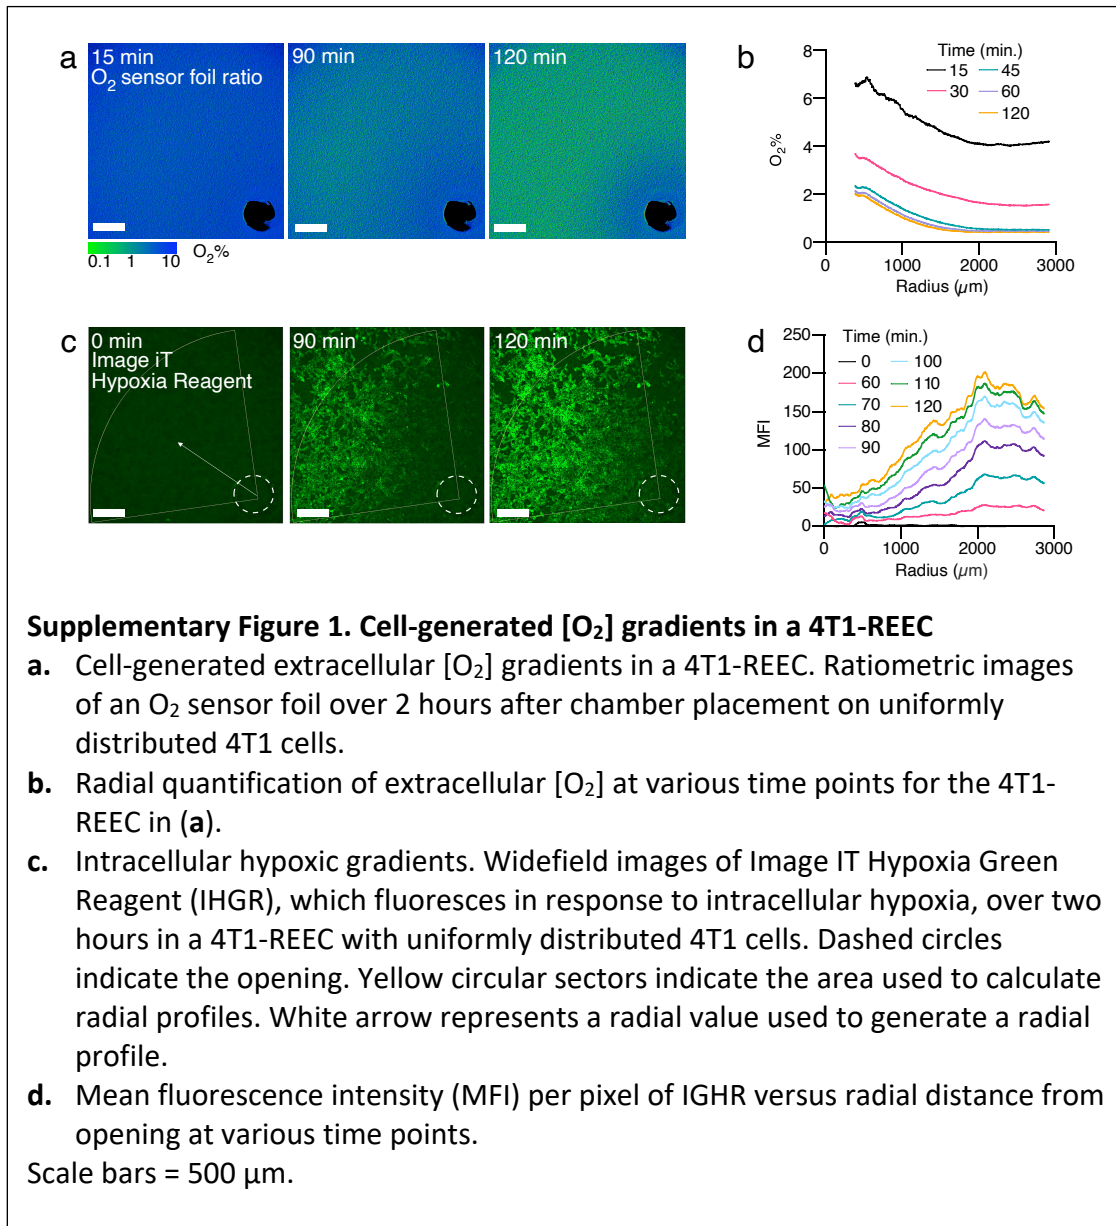

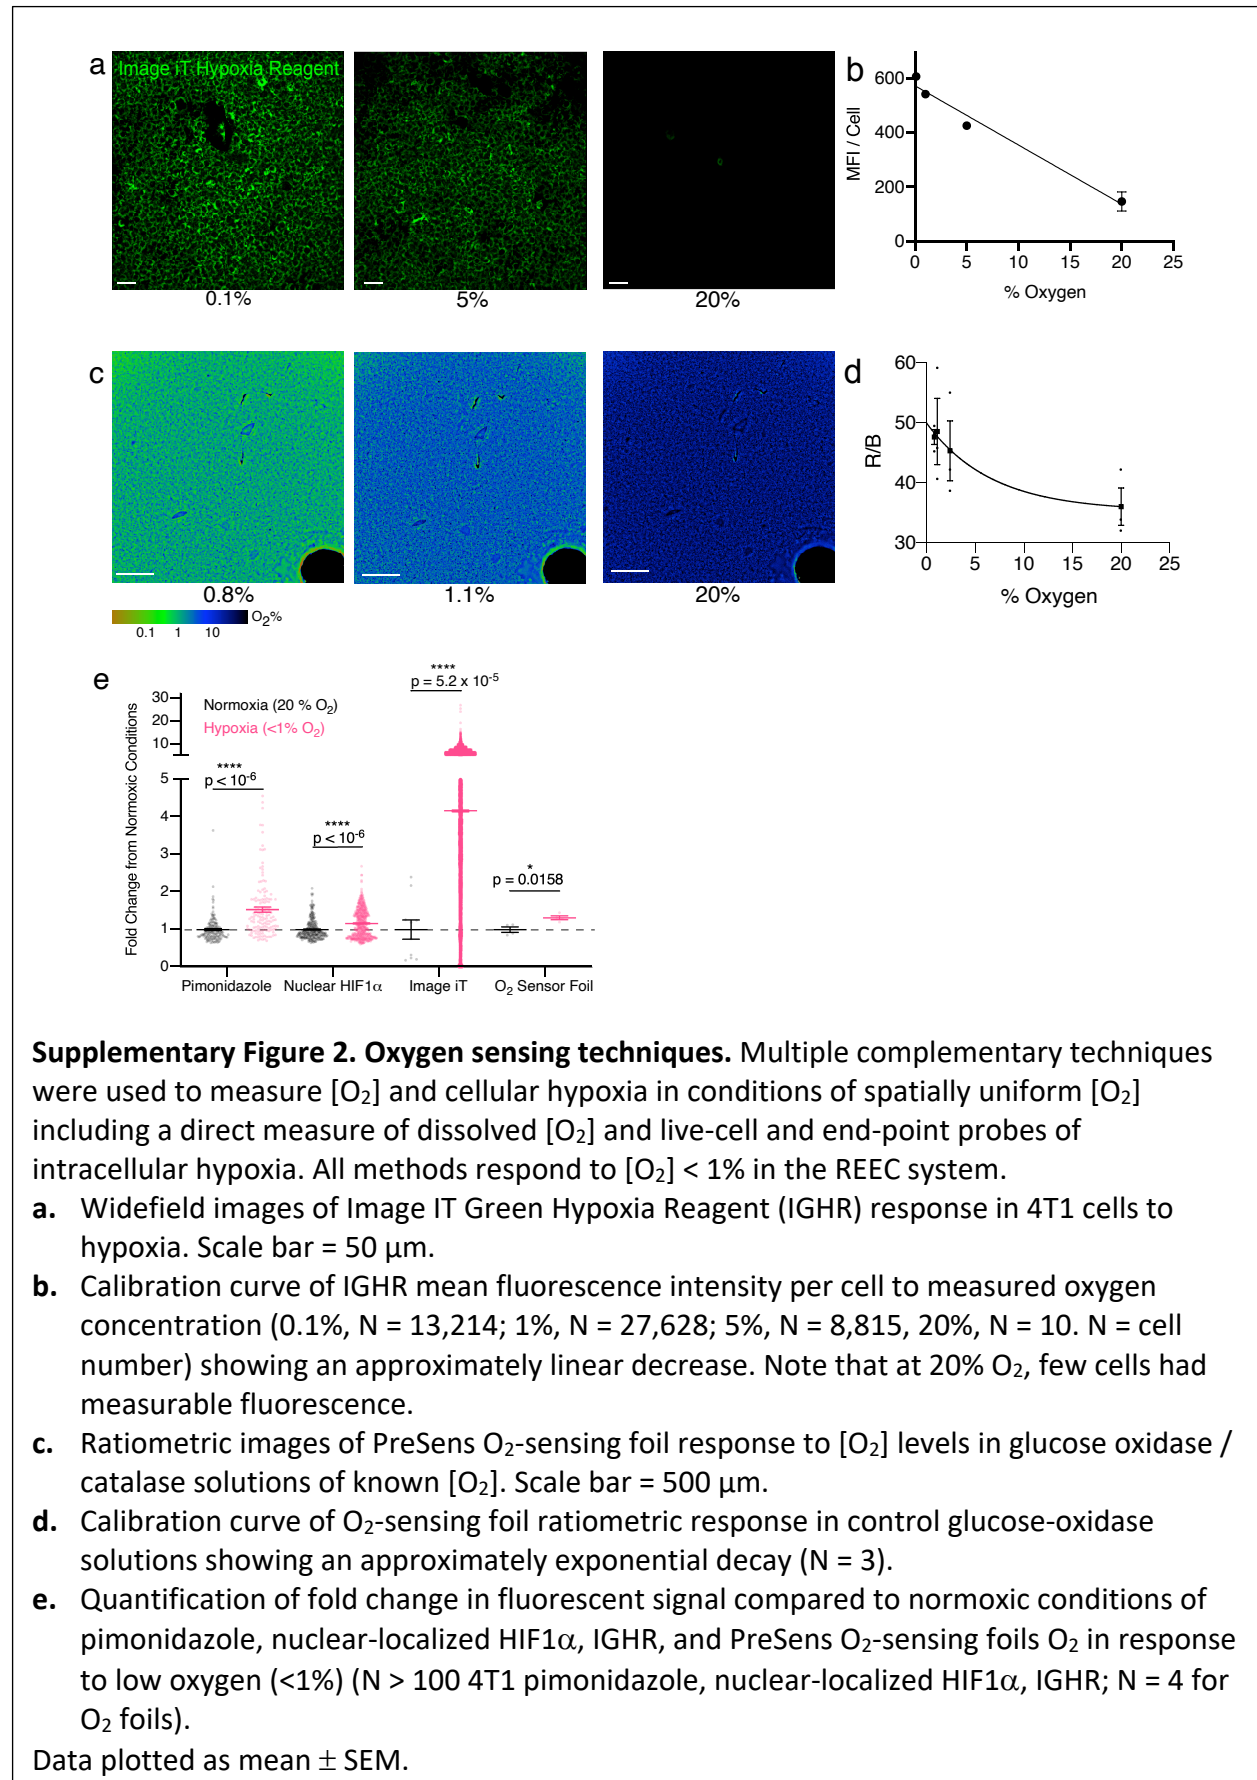

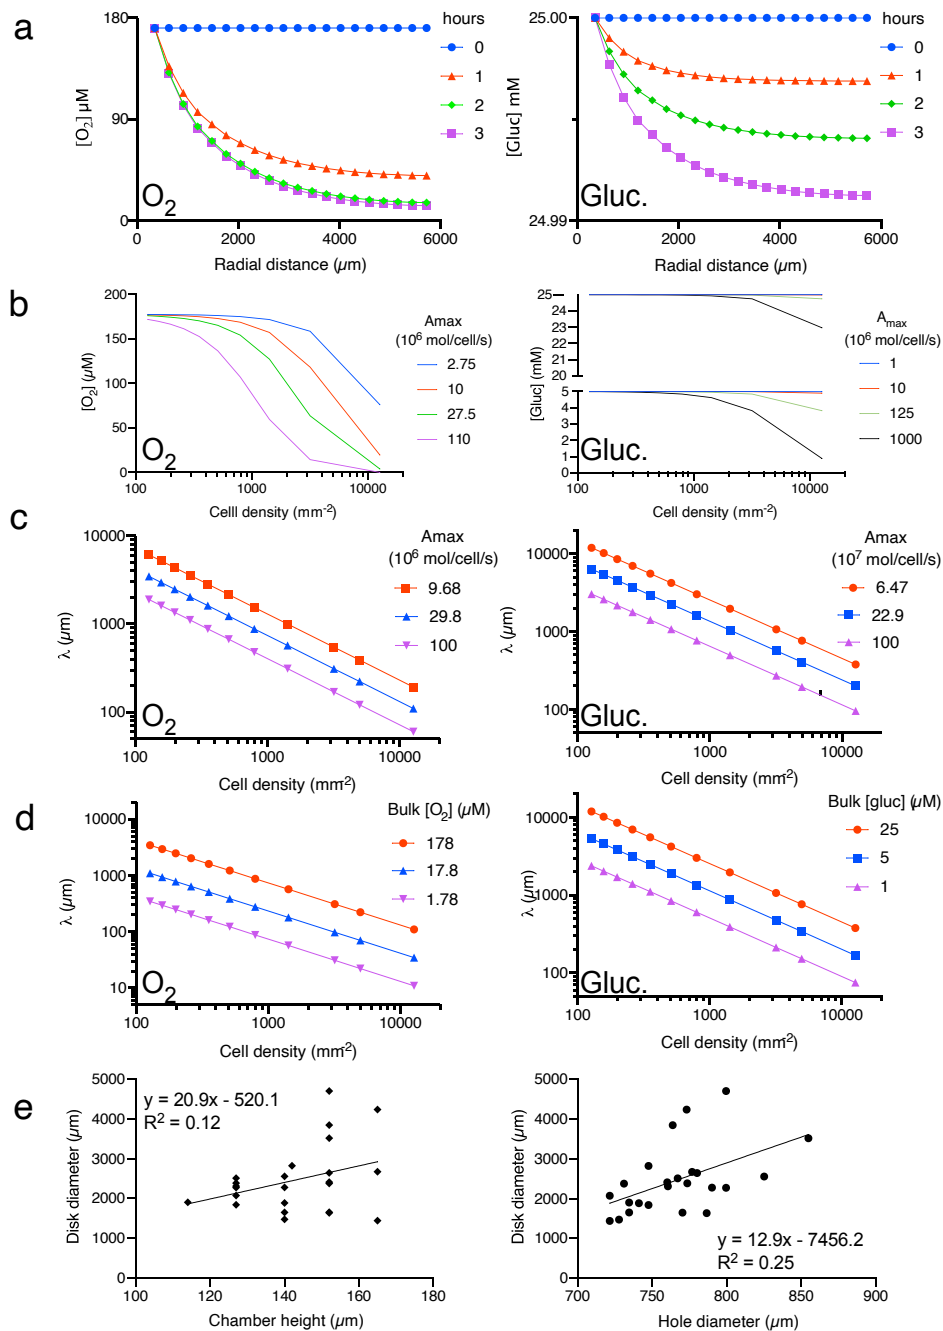

**Supplementary Figure 3. Diffusion-consumption 2D in silico model captures the gradient dynamics and steady state of the 4T1-REEC system.**

- a. Time evolution of the radial profiles of the O<sub>2</sub> (left) and glucose (right) concentrations (30-minute time steps) calculated with the chamber dimensions (hole diameter = 700 μm), 4T1 consumption rates (2.98x10<sup>7</sup> and 6.47x10<sup>7</sup> molecules/cell/s for O<sub>2</sub> and glucose, respectively), cell densities (cell diameter = 13.5 μm), and bulk concentrations used *in vitro* ([O<sub>2</sub>] = 171 μM, [Gluc.] = 25 mM). The [O<sub>2</sub>] decreases to a stable gradient within 2 hours. The glucose concentration changes little because the bulk concentration, 25 mM, is in excess of the cells' metabolic demands.

- b.** O<sub>2</sub> (left) and glucose (right) concentrations as a function of cell density and maximum consumption rate in normoxic nutrient-rich media,  $A_{max}$ , after 48 hours. Glucose concentration curves are shown for bulk concentrations of 25 mM (top) and 5 mM (bottom).
- c.** Characteristic steady-state distance,  $\lambda = \sqrt{DC_{bulk}/nA_{max}}$ , as a function of cell density,  $n$ , and maximum consumption rate,  $A_{max}$ .  $D$  is diffusion coefficient.  $\lambda$  is related to the stable cell disk radius. This estimation is independent of REEC geometry. Bulk concentrations ( $C_{bulk}$ ) were 178  $\mu$ M and 25 mM for O<sub>2</sub> (left) and glucose (right), respectively.
- d.** Characteristic steady-state distance as a function of cell density and bulk concentration. Here,  $A_{max}$  values for 4T1 cells were  $2.98 \times 10^7$  and  $6.47 \times 10^7$  molecules/cell/s for O<sub>2</sub> (left) and glucose (right), respectively.
- e.** Empirical measurements of 4T1 cell disk size depends on chamber height and hole diameter.

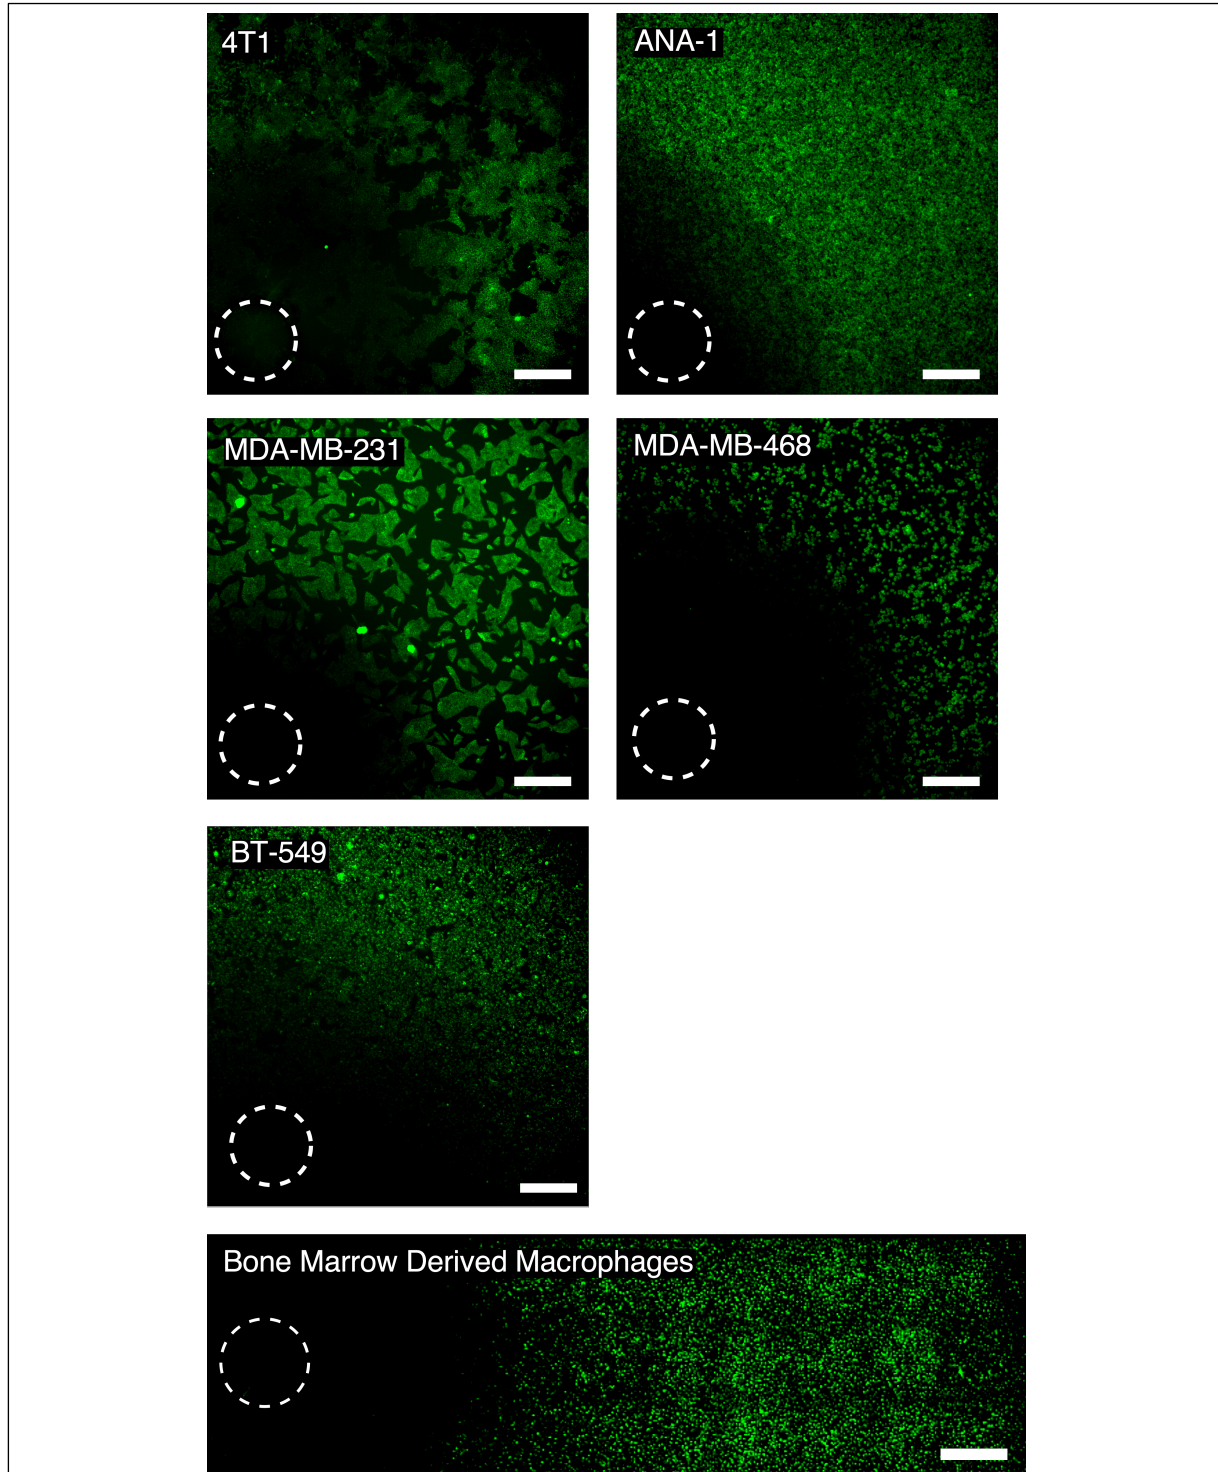

**Supplementary Figure 4. Human TNBC cells and mouse macrophages generate hypoxic gradients in REECs.** Widefield images of mouse 4T1 cells, human TNBC cells (MDA-MB-231, MDA-MB-468, and BT-549), mouse macrophages (ANA-1 and bone marrow-derived macrophages) stained with Image IT Green Hypoxia Reagent (IGHR) reveal hypoxic gradients in REECs 2 hours after chamber placement. The cells were uniformly present in the chambers, but only hypoxic cells fluoresce. The variation in distance to the hypoxic front likely results from differential oxygen consumption rates of the cell lines. Dashed circle indicates the opening. Scale bars = 500  $\mu$ m.

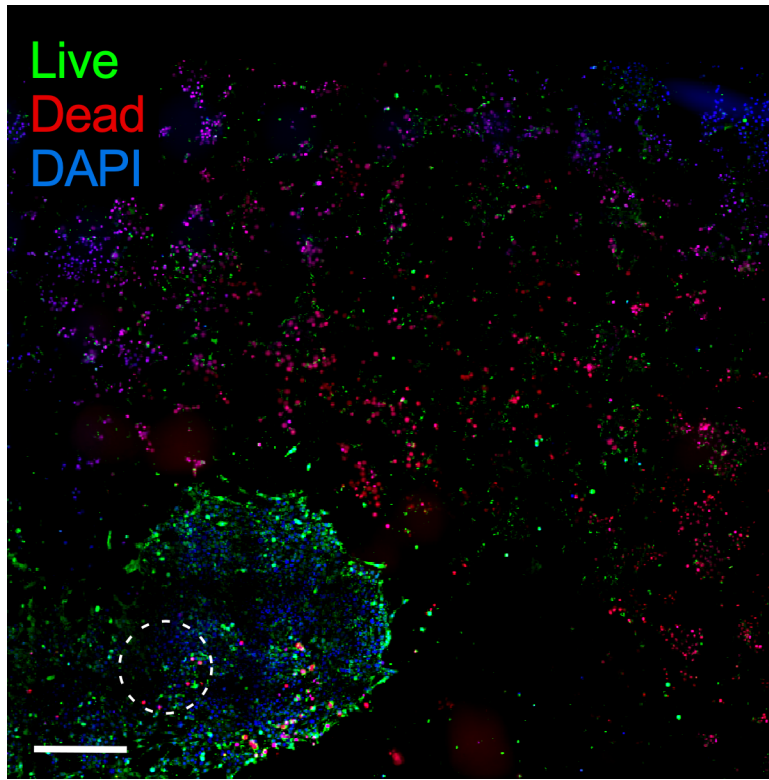

**Supplementary Figure 5. Cell viability across the REEC.** Live/dead staining shows necrotic zone beyond the cell disk live/dead staining in 4-day old 4T1 disks. Live cells are stained by calcein AM (green). Dead cells are stained by ethidium homodimer (red). Dashed circle indicates the opening. Scale bar = 500  $\mu$ m.



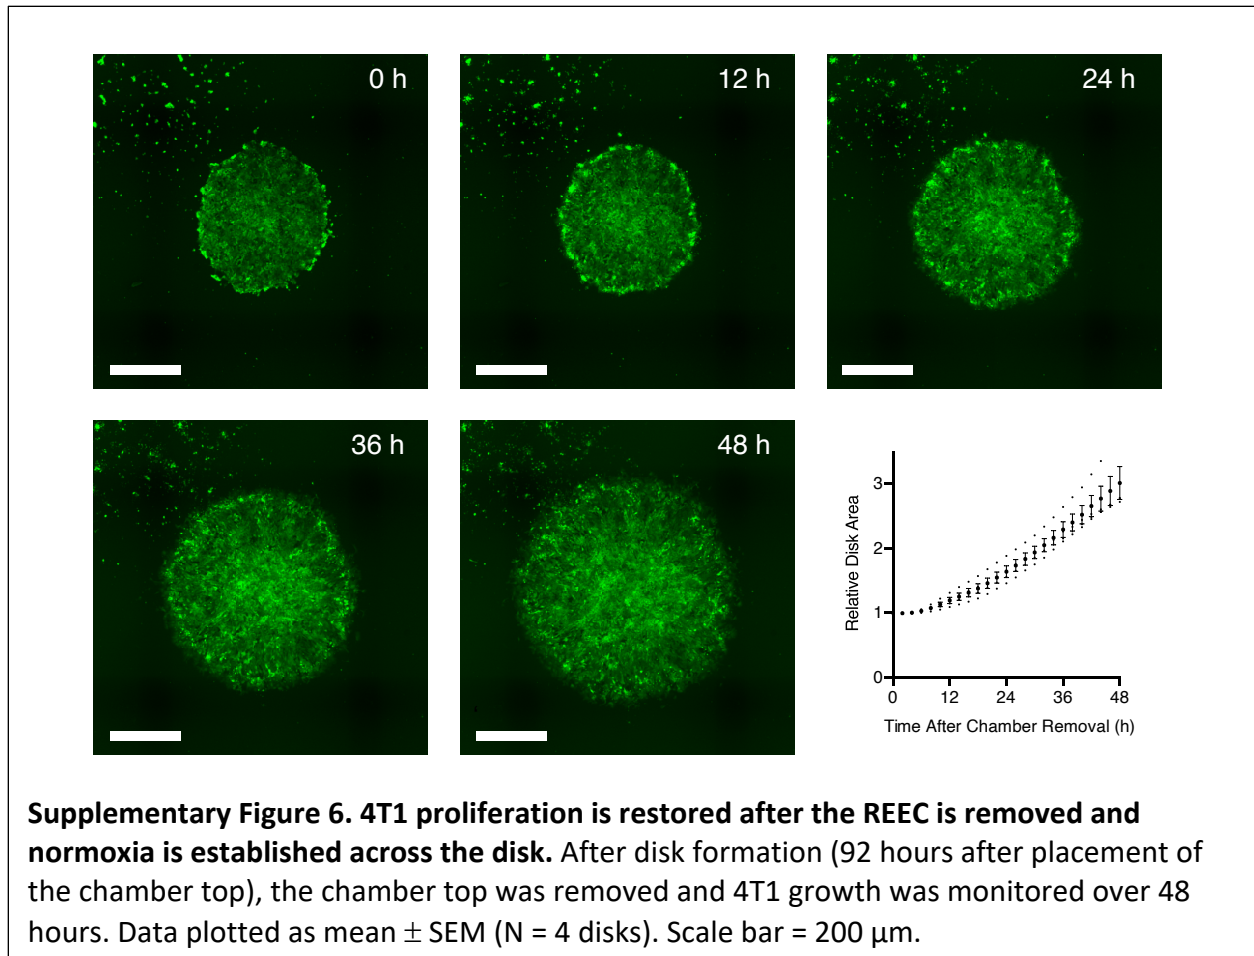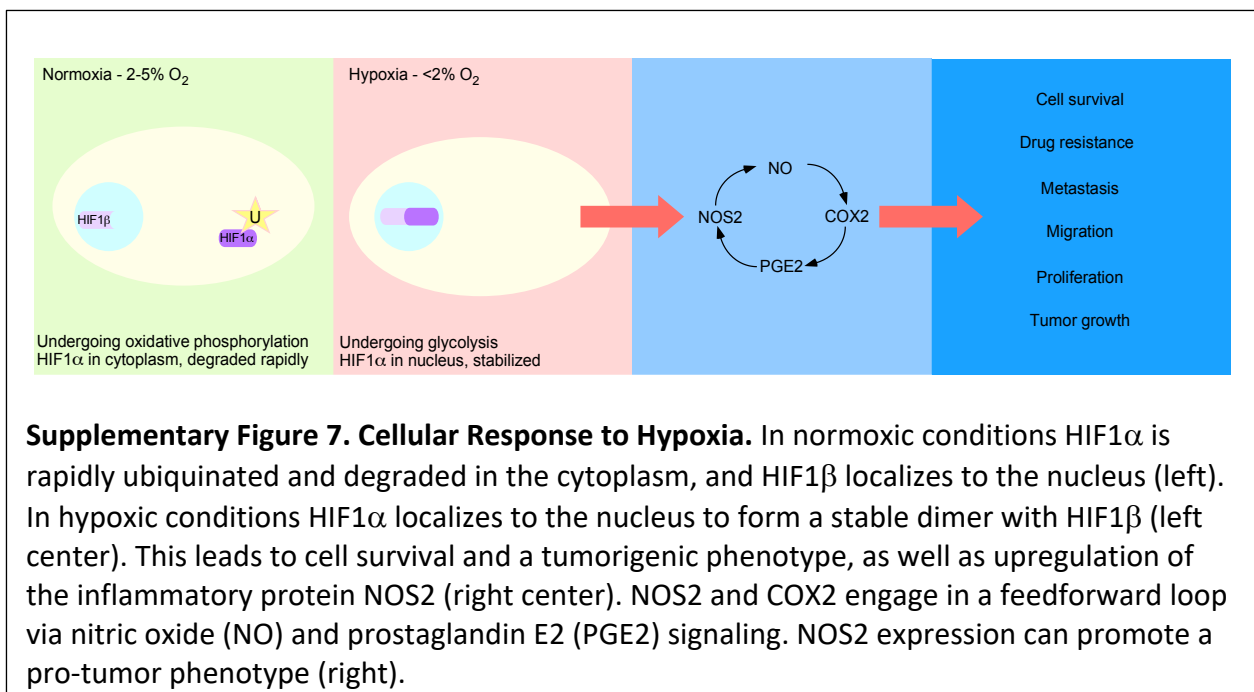

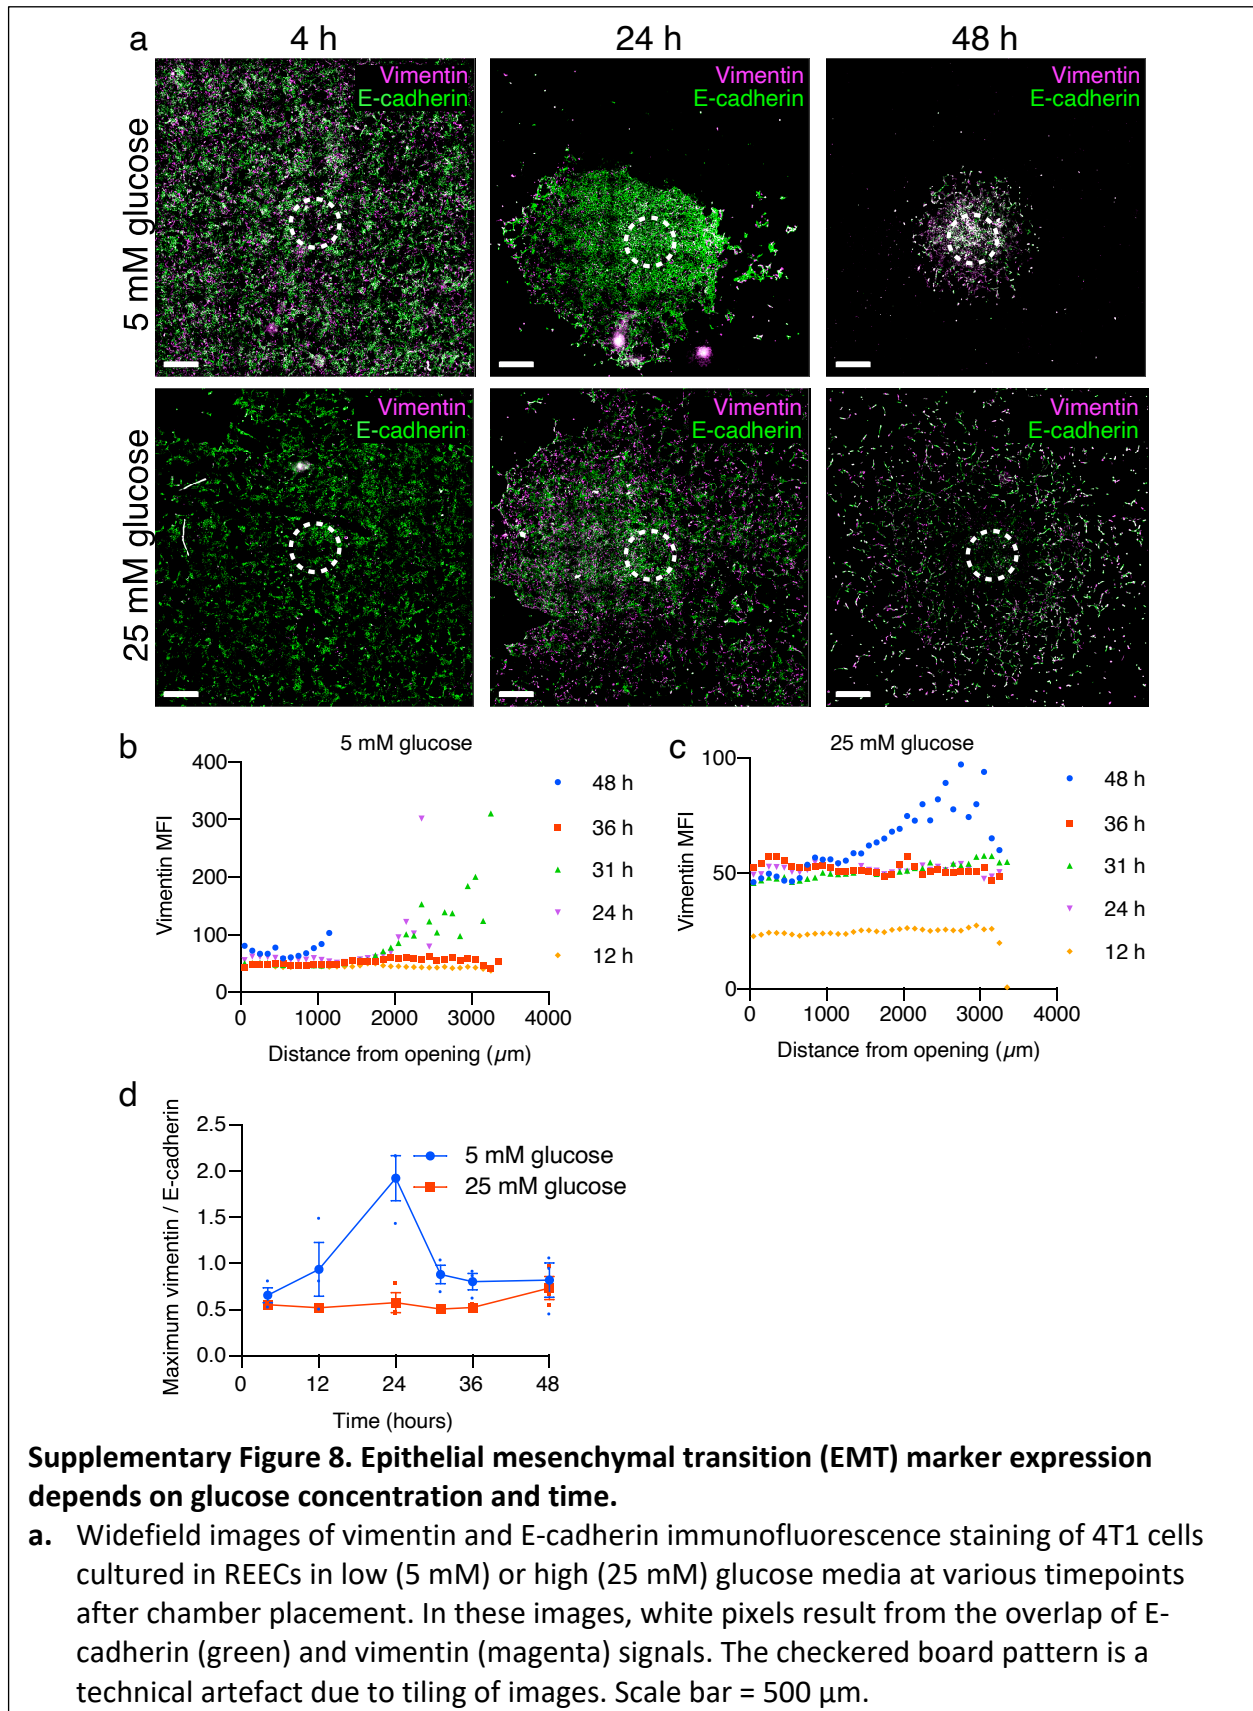

- b.** Expression of vimentin in low glucose (5 mM) media as a function of distance from opening at different time points (N = 1 per timepoint). Vimentin expression is transiently increased in the hypoxic regions of the disk from 24 to 31 hours during disk formation. MFI = mean fluorescence intensity.
- c.** Expression of vimentin in high glucose (25 mM) media as a function of distance from opening at different time points (N = 1 per timepoint). The 12 h timepoint is low because vimentin is an endpoint EMT marker, and at 12 h EMT has not yet begun. At later times the vimentin expression is elevated. MFI = mean fluorescence intensity.
- d.** Ratio of maximum vimentin to E-cadherin expression in disks for different glucose concentrations over time (N = 3 disks, 5 mM glucose; N = 2 disks, 25 mM glucose). The E-cadherin levels did not vary appreciably across the REEC over time. In the 5 mM case, after peaking during disk formation, the ratio returns to the initial value in stable disks. Data plotted as mean  $\pm$  SEM.

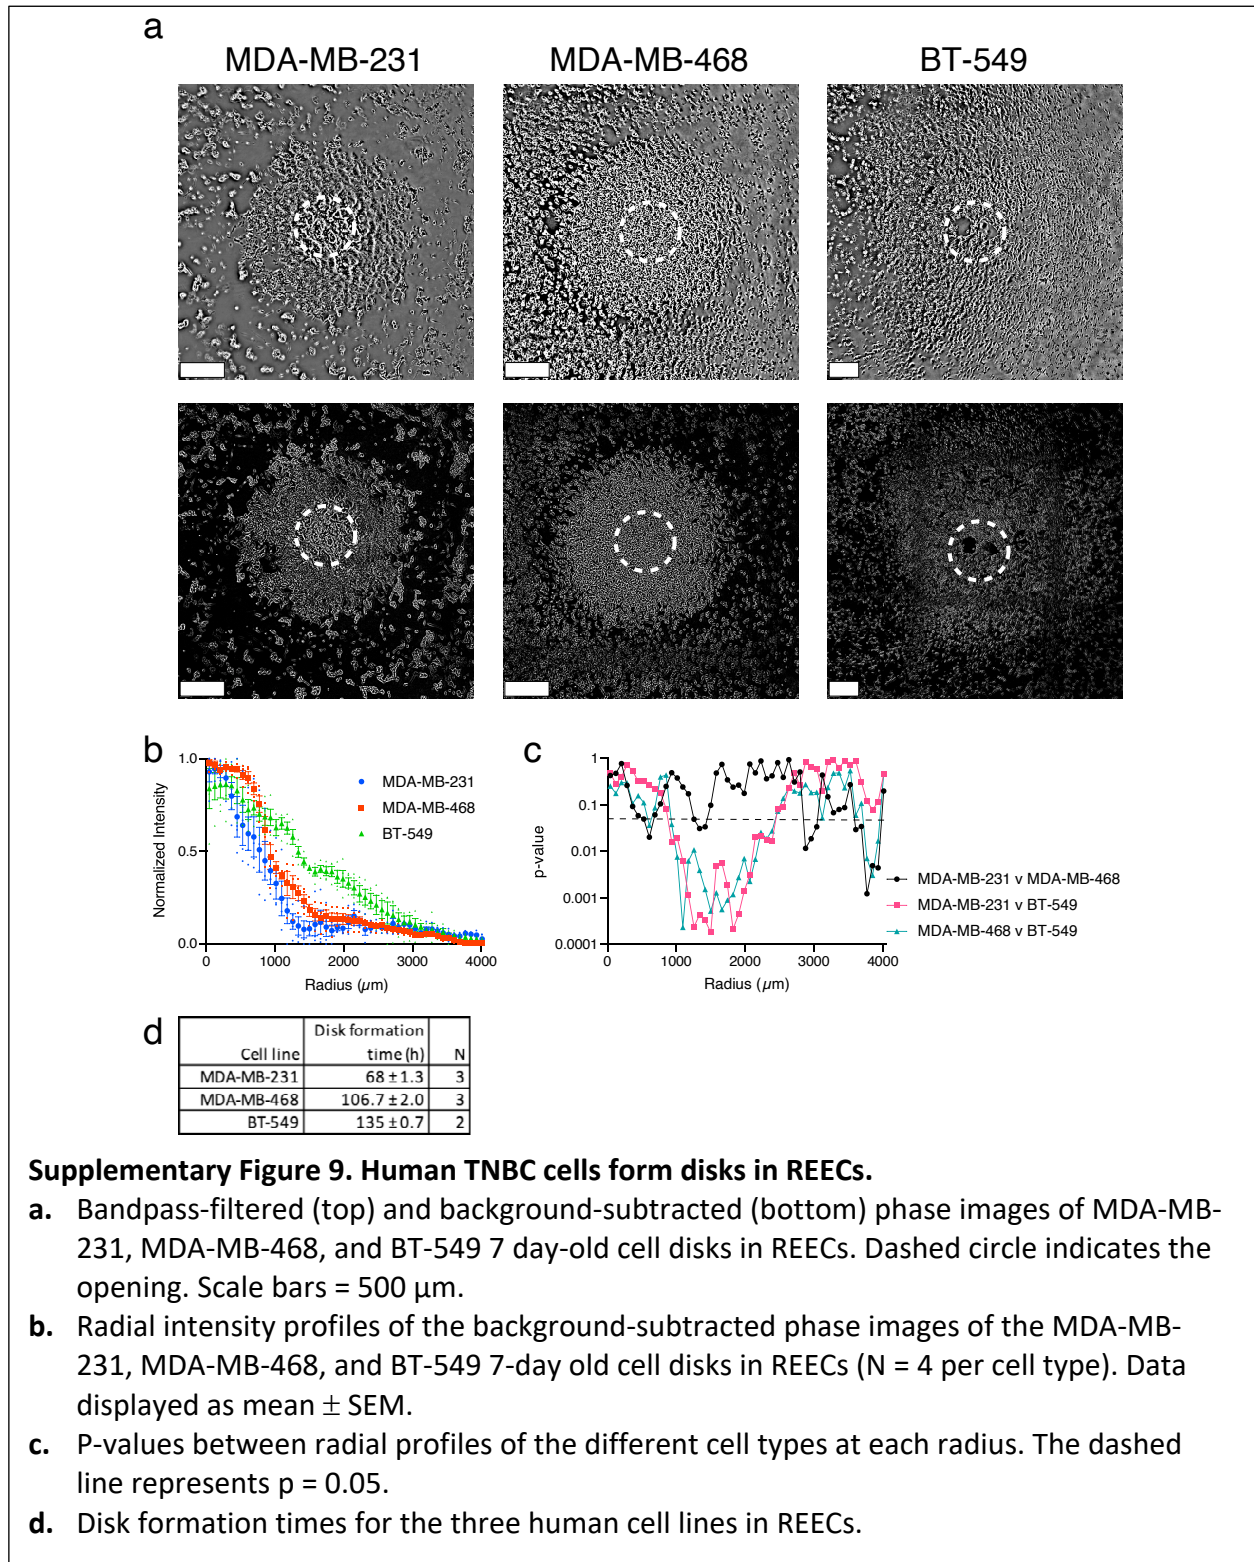

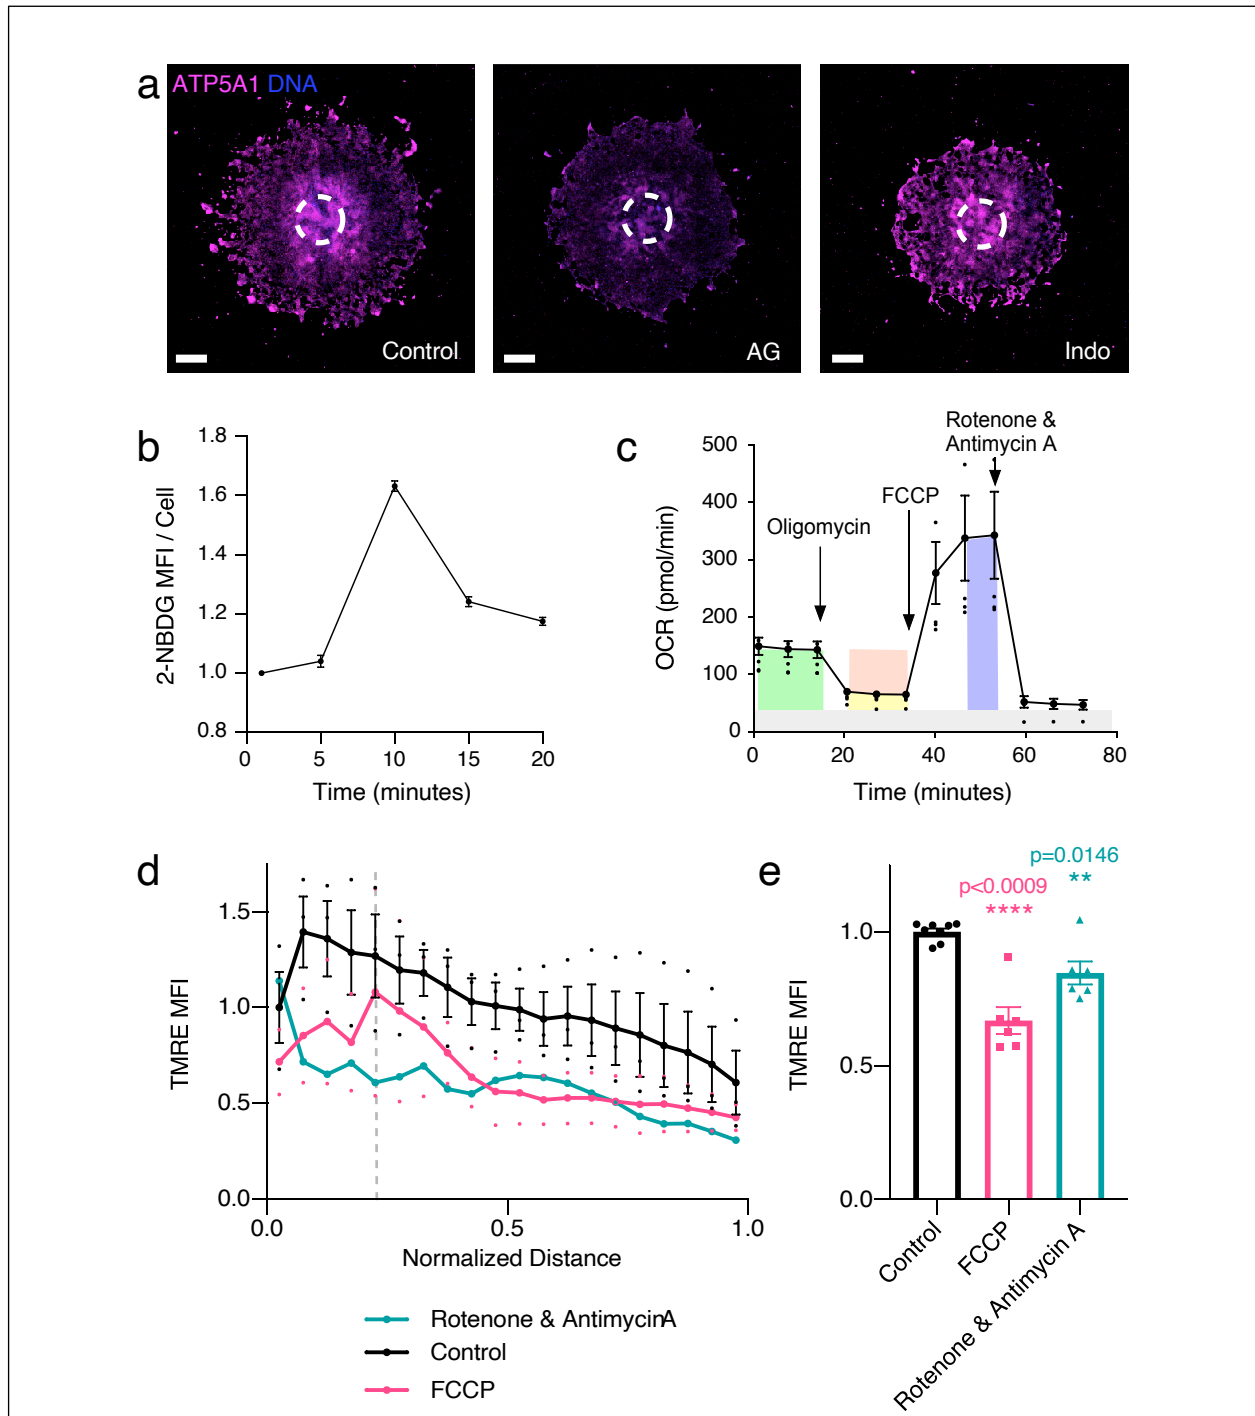

**Supplementary Figure 10. Mitochondrial controls.**

- Widefield images of ATP5A, a mitochondrial ATPase, used here as a measure of mitochondrial mass, immunofluorescence staining in 7-day old 4T1 disks, including a control disk (left), a disk treated with aminoguanidine (middle), and a disk treated with indomethacin (right). Scale bar = 500  $\mu$ m.
- 2-NBDG uptake in 4T1 cells over time in standard culture vessel (N > 135 cells). Data plotted as mean  $\pm$  SEM.

- c.** 4T1 oxygen consumption rate (OCR) measured by Seahorse Mito Stress test (N = 4 wells). Yellow represents basal respiration, green represents ATP-linked respiration, orange represents proton leak, purple represents maximal respiration, and grey represents non-mitochondrial contributions to OCR, respectively. Data plotted as mean  $\pm$  SEM.
- d.** Quantification of TMRE response (mean fluorescence intensity normalized to first point of the untreated control) across 4T1 disks before and after treatment with rotenone and antimycin-A or FCCP (N= 3, 2, 1 disks for control, FCCP, and rotenone & antimycin A, respectively). Vertical dashed line represents the edge of the opening. Images were collected 20 minutes after treatments. Data plotted as mean  $\pm$  SEM.
- e.** Quantification of TMRE response (normalized to the untreated control) before and after treatment with antimycin-A and rotenone or FCCP before and after treatments in standard cell culture conditions (N= 8, 6, 6 wells for control, FCCP, and rotenone & antimycin A, respectively). Data plotted as mean  $\pm$  SEM.

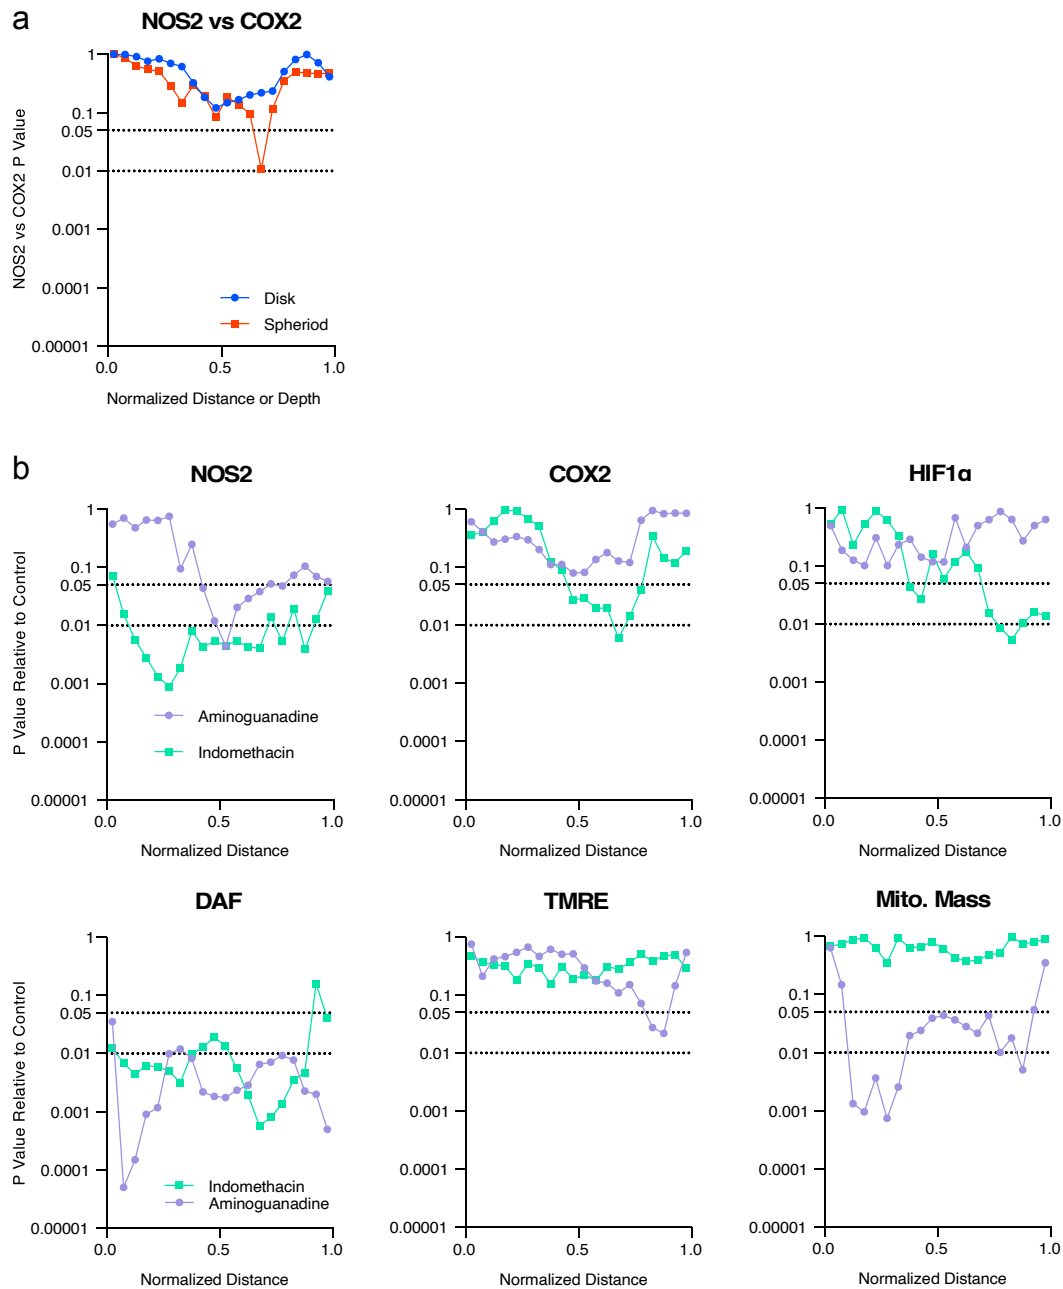

**Supplementary Figure 11 Statistics supplement for Figures 3 and 4.** P-Values were calculated at the normalized distances or depths corresponding to data points in Figures 3 and 4.

**a.** P-values quantifying the differences between the NOS2 and COX2 MFI/cell values in the control disks and spheroids that were presented in Fig. 3. Note that the NOS2 and COX2 signals are most different from one another in the mid-hypoxic region of both disks and spheroids (Normalized distance or depth between 0.5 and 0.75).

**b.** P-values quantifying the differences between the MFI/cell values observed in the control disks and the MFI/cell values observed in the aminoguanidine- or indomethacin-treated disks that were presented in Fig. 4. The p-values were calculated using the MFI/cell of NOS2, COX2, HIF1 $\alpha$ , DAF, TMRE, and mitochondrial mass (measured by ATP5A).

“Normalized Distance” refers to the relative distance from the center to the edge of a disk.

“Normalized Depth” refers to relative distance from the surface to the center of a spheroid.

MFI = mean fluorescence intensity normalized to the first point.



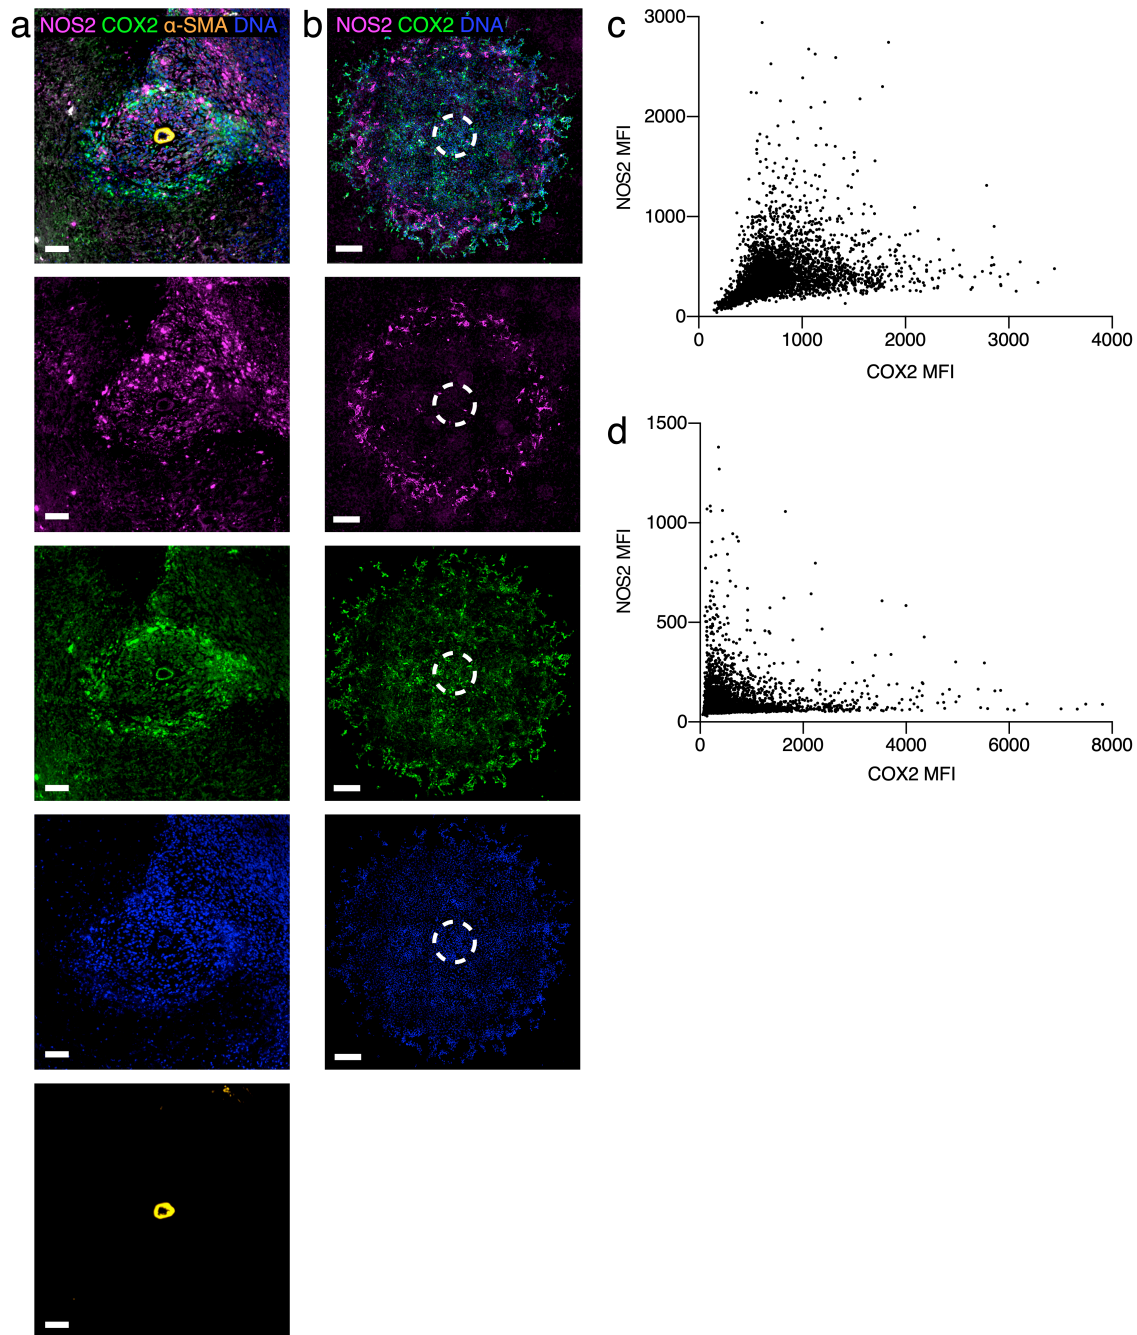

**Supplementary Figure 12. NOS2 and COX2 are expressed in different cells.**

- a. Widefield images of NOS2, COX2,  $\alpha$ -SMA, and DAPI multiplexed immunofluorescence staining surrounding a blood vessel in a 4T1 tumor. Scale bar = 500  $\mu$ m.
- b. Widefield images of NOS2, COX2, and DAPI immunofluorescence staining of a 7-day old 4T1 disk. Scale bar = 500  $\mu$ m.
- c. NOS2 vs. COX2 intensity for each cell in the 4T1 tumor section shown in **a** (N = 4196; Pearson's correlation coefficient  $\rho=0.2477$ ).
- d. NOS2 vs. COX2 intensity for each cell in the 4T1 disk shown in **b** (N = 7339; Pearson's correlation coefficient  $\rho=0.0969$ ).

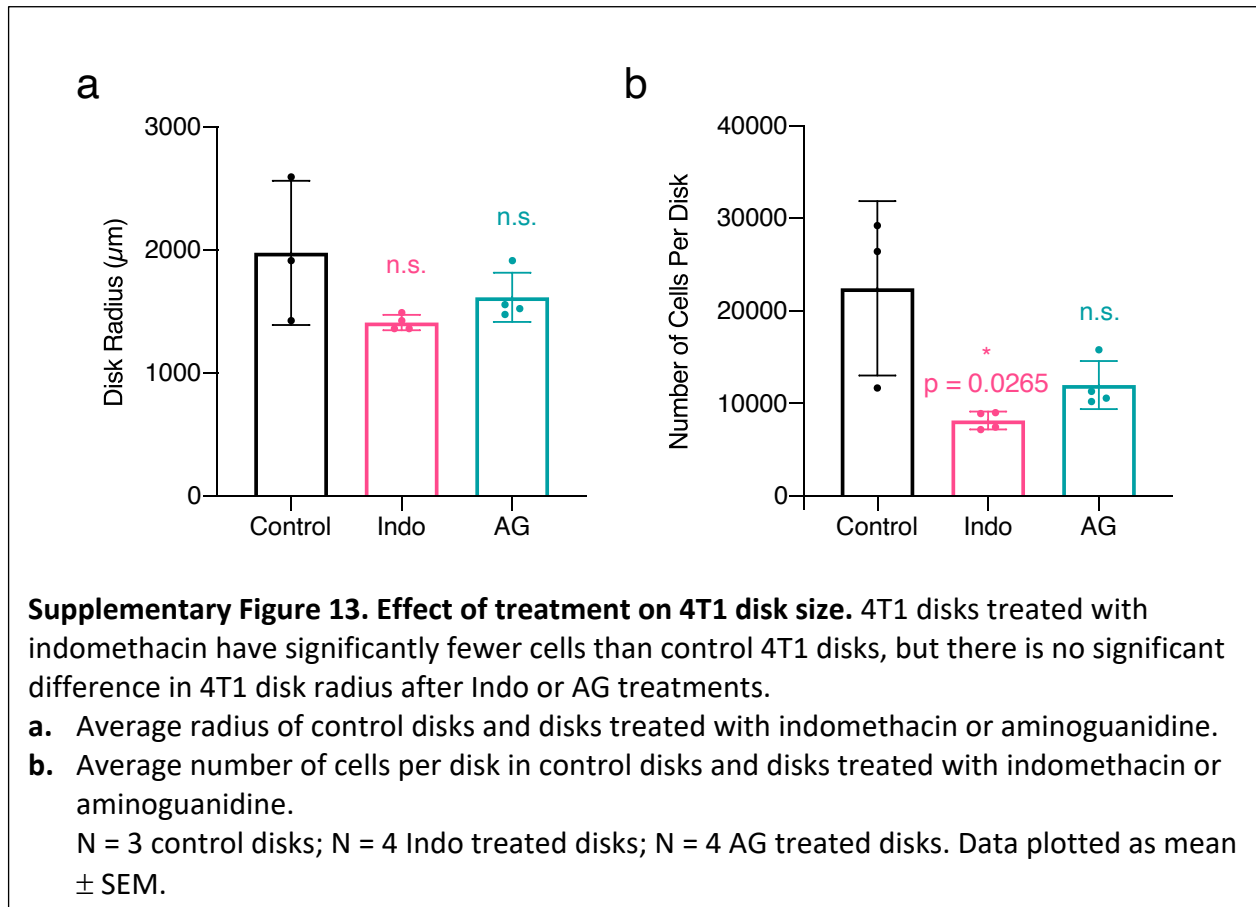

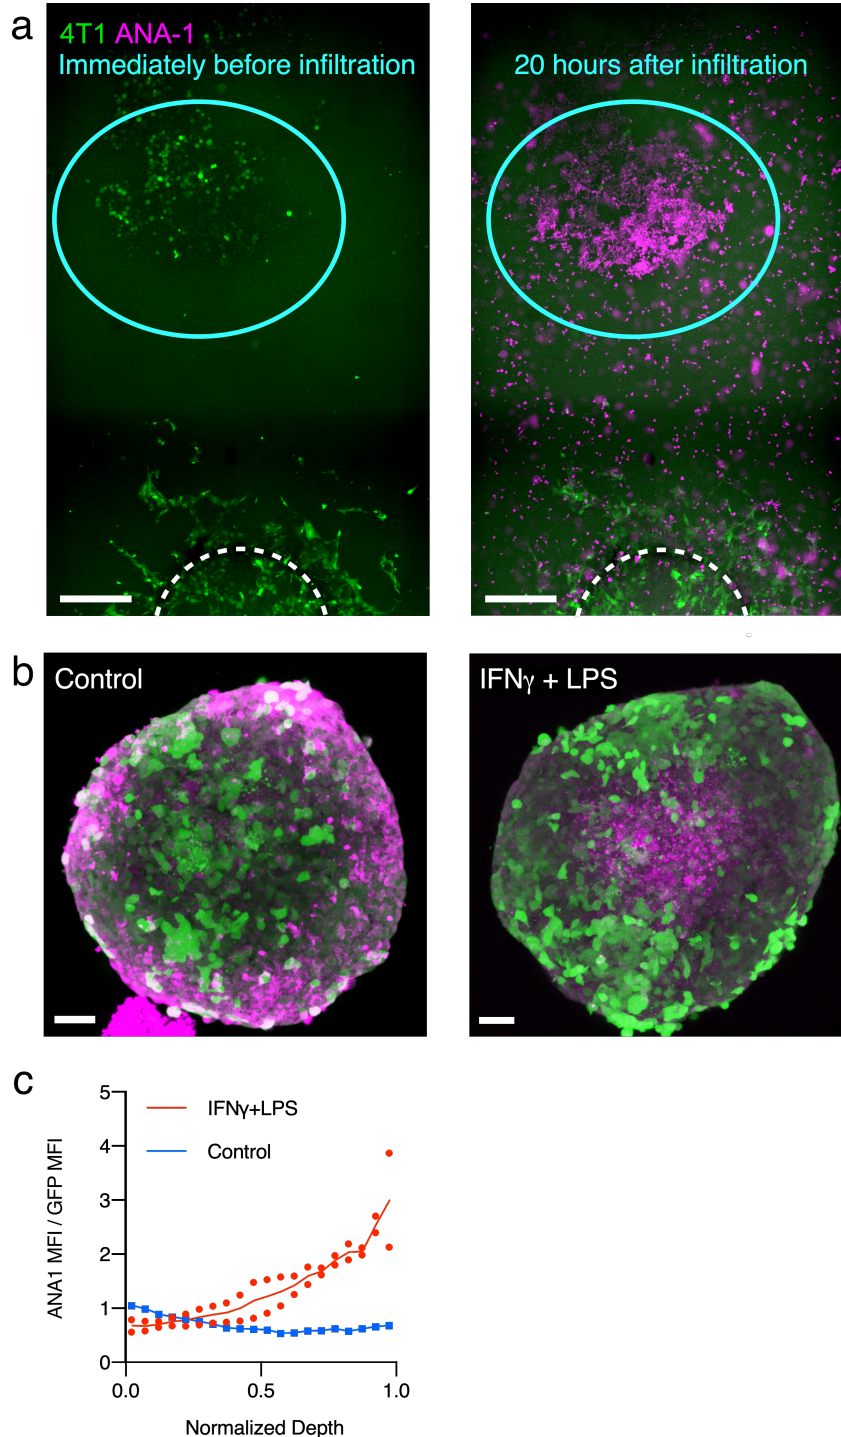

**Supplementary Figure 14. ANA-1 macrophages survive in the hypoxic and necrotic zones of 4T1 disks, and stimulated ANA-1 macrophages infiltrate the hypoxic core of spheroids.**

**a.** After 4 days, GFP-4T1 cells (green) form a disk, while some dying GFP-4T1s (outlined with blue dashed circle) remain in the hypoxic region of the chamber, far from the opening (left). ANA-1 macrophages were injected into the chamber through the hole (dashed half-circle). Within 20 hours after macrophage (magenta) injection, the macrophages are localized to the necrotic zone (right). Scale bar = 700  $\mu$ m.

- b.** Confocal microscope images of the equatorial planes of cleared GFP-4T1 spheroids with unstimulated (left) ANA-1 macrophages (magenta) and IFN $\gamma$  + LPS stimulated macrophages (right) demonstrate stimulated macrophages infiltrate the hypoxic core of 4T1 (green) spheroids. Scale bar = 50  $\mu$ m.
- c.** Quantification of the ratio of ANA-1 mean fluorescent intensity to GFP mean fluorescent intensity as a function of depth from the surface to the center of the spheroids (N = 2 per group). Data plotted with mean (line).

## Supplementary Method

### REEC construction and use

#### Materials

- Compressed air drill (400x High Speed Engraver, SCM Systems, Menomonee Falls, WI)
- UV Curable epoxy (NOA81, Norland Products, Cranbury, NJ)
- UVO-Cleaner Model 342 (Jelight Company Inc., Irvine, CA)
- 100 $\mu$ m tall 18 mm stainless steel O-rings (PN 90214A123, McMaster-Carr, Robbinsville, NJ)
- 18 mm diameter coverslips, number 1 thickness
- Glass slides
- Scotch tape
- Ethanol
- Forceps (Ted Pella, Redding, CA)
- 500  $\mu$ m drill bits (SCM Systems)
- 12-well glass bottom plates (PN P12-1.5H-N, CellVis, Mountain View, CA)
- Laser cut mylar clamps
- Laser cut mylar 12-well plate rims

#### Warnings

Make sure to wear appropriate personal protective equipment, including eye and ear protection during glass drilling.

## **Making chambers and plates**

### **Modify the multiwell plate**

1. Apply UV curable epoxy carefully around each well on a 12-well, glass-bottom plate
2. Apply rims so that each well has even overhang of mylar
3. Cure in UV box for five minutes
4. Use immediately for cell culture or store somewhere covered and protected, sterilize in UV box for at least three minutes before use

### **Assemble the REEC**

1. Tape a 18 mm coverslip to a clean glass slide to prevent the coverslip from moving during the drilling. Tape applied to opposite edges of the coverslip, or to 3 equally spaced positions around the edge is usually sufficient.
2. Drill a hole through the center of the coverslip. Hold the drill normal to the glass surface and press lightly with the drill on the glass -- do not push hard.
3. Once the drill has gone through the coverslip, remove the coverslip from the slide. Clean debris from the coverslip with kimwipes and ethanol. It is important to ensure there are no pieces of glass or tape residue on the coverslip.
4. Apply UV curable epoxy carefully to a stainless-steel O-ring, place glass coverslip using forceps on the O-ring. Avoid applying too much epoxy.
5. Cure in UVO-Cleaner for five minutes, glass side up.
6. Apply glue around clamp

An *in vitro* tumorigenesis model based on live-cell-generated oxygen and nutrient gradients. Gilmore, et al.

7. Place glued coverslip and O-ring on the clamp so that the glass is in between the mylar clamp and the stainless-steel O-ring
8. Cure in UVO-Cleaner for five minutes, mylar side up.
9. Flip over with forceps
10. Place in UVO-Cleaner for three minutes.
11. At this point, the chambers are sterile. Use immediately or store in covered location and sterilize in UVO-Cleaner for at least 3 minutes, each side, before use.

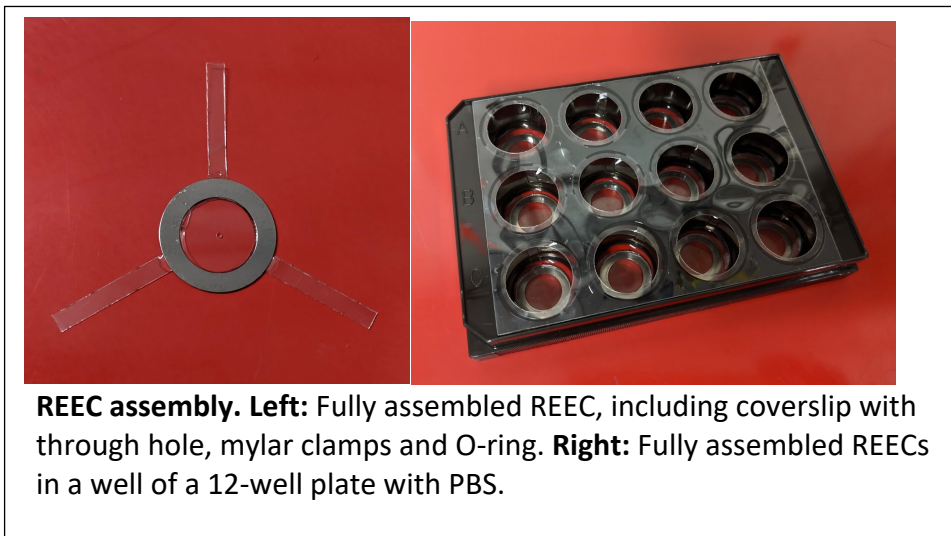

### Cell Culture for REECs

1. Plate 1 mL of cells per well with desired density of cells in sterile, rim-glued, 12-well, glass-bottom plate. For 4T1s, use a density of 400,000 cells/mL.
2. Allow cells to adhere for an appropriate time. This will vary by cell type. For 4T1s, allow to adhere overnight.

To place chamber, use forceps to gently push sterilized chamber down onto cells. Avoid scratching surface and removing cells or allowing air bubbles to form in the chamber.
